**Similar clinical improvement and maintenance after rTMS at 5 Hz using a simple vs. complex protocol in Alzheimer's disease.**

Alcalá-Lozano, R.<sup>1</sup>, Morelos-Santana, E.<sup>1,2</sup>, Cortés-Sotres, J.F.<sup>3</sup>, Garza-Villarreal, E.A.<sup>1,4</sup>, Sosa-Ortiz, A.L.<sup>5</sup>, Gonzalez-Olvera, J.J.<sup>1</sup>

<sup>1</sup>Subdirección de Investigaciones Clínicas, Instituto Nacional de Psiquiatría "Ramón de la Fuente Muñiz", Mexico City, Mexico

<sup>2</sup>Facultad de Psicología, Universidad Nacional Autónoma de México, Mexico City, Mexico

<sup>3</sup>Departamento de Apoyo Académico y Posgrado, Instituto Nacional de Psiquiatría "Ramón de la Fuente Muñiz", Mexico City, Mexico.

<sup>4</sup>Department of Clinical Medicine & Center of Functionally Integrative Neuroscience/MINDLAB, University of Aarhus, Denmark

<sup>5</sup>Dementia Laboratory, Instituto Nacional de Neurología y Neurocirugía "Manuel Velasco Suárez", Mexico City, Mexico

Corresponding:

Dra. Ruth Alcalá Lozano

Investigadora en Ciencias Médicas "A"

Subdirección de Investigaciones Clínicas

Calzada Mexico-Xochimilco 101, Col. San Lorenzo Huipulco, C.P. 14370

Instituto Nacional de Psiquiatría "Ramón de la Fuente Muñiz"

Mexico City, Mexico

Keywords

Dementia; Alzheimer disease; transcranial magnetic stimulation, repetitive; behavioral symptoms; cognitive function

## Abstract

**Background:** Current treatments for Alzheimer's disease (AD) have a limited clinical response and methods, such as repetitive transcranial magnetic stimulation (rTMS), are being studied as possible treatments for the clinical symptoms with positive results. However, there is still seldom information on the type of rTMS protocols that deliver the best clinical improvement in AD.

**Objective:** To compare the clinical response between a simple stimulation protocol on the left dorsolateral prefrontal cortex (IDL PFC) against a complex protocol using six regions of interest.

**Methods:** 19 participants were randomized to receive any of the protocols. The analysis of repeated measures evaluated the change.

**Results:** Both protocols were equally proficient at improving cognitive function, behavior and functionality after 3 weeks of treatment, and the effects were maintained for 4 weeks more without treatment.

**Conclusion:** We suggest rTMS on the IDL PFC could be enough to provide a clinical response, and the underlying mechanisms should be studied.

## Introduction

Alzheimer's disease (AD) is a neurodegenerative disorder of uncertain etiology that affects around 46.8 million people worldwide. It is characterized by progressive cognitive decline that affects behavior and function. In AD, there is a limited pharmacological treatment efficacy (1). Clinical trials using rTMS in AD have found positive effects on cognition, behavior and function (2–4). High frequency (HF) rTMS applied on the right or left DLPFC has shown improvement in language abilities, in cognitive function, functionality and behavior for up to 3 months (5). Other studies have shown similar results on cognition, behavior and function using HF applied over several cortical sites in a complex design (6). This complex design may include at least 6 cortical targets, and it is suggested to be more beneficial than DLPFC (7,8). In this study we compare two rTMS modalities: simple stimulation of the IDLPFC vs. complex stimulation of 6 regions related to AD's known brain affected areas.

## Materials and Methods

The study was conducted according to the Declaration of Helsinki and was approved by the ethics committee of the Instituto Nacional de Psiquiatría (No. CEI/C/049/2015). The study was registered in ClinicalTrials Gov. Sample size was calculated using a repeated measures design with an alpha of 0.05, a power of 90% and effect size of 0.5 (9), for a sample size of 22 participants (11 per group). We recruited 33 patients with diagnosis of dementia, and 19 with diagnosis of AD were included in the clinical trial (criteria in Supplementary Methods).

The design was longitudinal, single blind and the patients were randomized for the treatment groups: 1) IDLPFC, and 2) 6-ROIs. In both groups we used rTMS for 3 weeks where each

session consisted of 30 trains of 10 sec of duration separated by 1 min rests, with a frequency of 5 Hz at 100% of the motor threshold. The IDLPFC arm was applied using a MagPro R30 (Magventure, Denmark) with an 8-shape coil model MCF-B70 and consisted of stimulation only in the IDLPFC, localized using the 10-20 system, 1,500 pulses per session. The 6-ROIs arm was applied using a MagPro (Dantec, Denmark) with an 8-shape coil model MC-B70 and consisted of stimulation in 6 different regions with the following protocol. For this, we alternated stimulation between regions each day; on one day we stimulated three areas: a) Broca's area, b) Wernicke's area and c) IDLPFC, and the next day we stimulated three areas: d) lpSAC, e) rpSAC, f) rDLPFC, both days with 500 pulse per area, for 1,500 pulses per session.

Our primary outcome measure was changes in cognitive function, using ADAS-cog at baseline, week 3 (during stimulation), and week 7 (4 weeks after the last rTMS session). Our secondary outcome measures were changes in: cognitive measures (Mini Mental State or MMSE), behavioral symptoms report (NPI), depression symptoms (GDS-Yesavage), functionality evaluation (IDDD) and Clinical Global Impression (CGI). Clinical improvement in cognition was defined as: 1) reduction of 4 points in ADAS-cog and, 2) an increase of 1.5 - 2 higher than baseline MMSE. In the other variables, any positive change in comparison to the baseline was considered improvement. We performed descriptive and inference analysis of all variables using IBM SPSS ver. 22 (International Business Machines Corp, New York, USA). For outcome measures analyses we used Repeated-measures ANOVA for within-subject factors (Baseline, Week3 and Week7) and particularly for Mini Mental there were four measures (Baseline, Week1, Week2, Week3 and Week7), with an alpha of 0.05.

## Results

For the IDLPFC group we included 10 patients (6 female, mean age 73.30 ( $\pm$  6.03)), and for the 6-ROIS group we included 9 patients (5 female, mean age 71 ( $\pm$  4.27)). We had no drop-outs in our study and four patients merely reported a transitory mild headache after rTMS as a secondary effect. The baseline scores were similar in both groups in all measurements. We found significant clinical improvement in primary and secondary outcome measures after rTMS treatment (Week3) in both groups. We found that the patients maintained this effect at follow-up after one week without treatment (Week7). We did not find significant differences between groups in any measure, meaning that both rTMS modalities were equally beneficial (Figure 1).

## **Discussion**

In our study we compared two different rTMS modalities of treatment in AD patients. We found that both modalities improved the patients' cognitive, behavioral and functional measures equally. Therefore, the benefit of rTMS in AD may mostly rely on IDLPFC stimulation. The neurophysiological mechanisms related to the beneficial effects of rTMS are still poorly understood. A proposed mechanism suggests an increase in processing efficiency due to the direct modulation of cortical areas or networks by adjusting pathological brain patterns of activity and inducing improved activity patterns. The absence of a difference between rTMS modalities may be explained by the stimulation of the IDLPFC in both. The IDLPFC may act as an important hub for network integration in cognition and behavior, which is pathologically disrupted in AD. Therefore, the use of rTMS in this region may improve the network activity and integration, which may be directly related to clinical improvement (10).

A limitation of our study was the lack of a sham group. However, the goal of our study was to directly compare two different modalities, complex vs. simple rTMS and not to assess the already demonstrated clinical effect of in both modalities (8). We decided to first investigate both

modalities directly as finding differences between modalities may have justified a sham clinical trial. Another limitation is the lack of a neuronavigator to determine the precise localization of each stimulated region. Nevertheless, the 10-20 system is the most used in the daily clinical practice due, hence, results may be more relevant in that regard. In summary, we found that rTMS of the IDLPFC and the stimulation of six different regions was equally beneficial for AD patients at the safe frequency of 5 Hz. Therefore, we do not see a benefit from applying the complex stimulation.

### **Acknowledgements**

We would like to thank Dr. Carlos H. Berlanga Cisneros for his supervision in this project. The project was funded by the Instituto Nacional de Psiquiatría “Ramón de la Fuente Muñiz” No. SIC-16-001.

### **References**

1. Prince M, Wimo A, Guerchet M, Gemma-Claire A, Wu Y-T, Prina M. World Alzheimer Report 2015: The Global Impact of Dementia - An analysis of prevalence, incidence, cost and trends. *Alzheimer's Dis Int* 2015;1-20.
2. Nardone R, Tezzon F, Höller Y, Golaszewski S, Trinkka E, Brigo F. Transcranial magnetic stimulation (TMS)/repetitive TMS in mild cognitive impairment and Alzheimer's disease. *Acta Neurol Scand* 2014;129(6):351–66.
3. Hsu W-Y, Ku Y, Zanto TP, Gazzaley A. Effects of noninvasive brain stimulation on cognitive function in healthy aging and Alzheimer's disease: a systematic review and meta-analysis. *Neurobiol Aging* 2015;36(8):2348–59.
4. Alcalá-Lozano R, Morelos ED, Osorio O, González JJ. An overview of repetitive

- transcranial magnetic stimulation ( rTMS ) in Alzheimer ' s disease. 2017;40(4):171–8.
5. Ahmed MA, Darwish ES, Khedr EM, El Serogy YM, Ali AM. Effects of low versus high frequencies of repetitive transcranial magnetic stimulation on cognitive function and cortical excitability in Alzheimer's dementia. *J Neurol* 2012;259(1):83–92.
  6. Rabey JM, Dobronevsky E, Aichenbaum S, Gonen O, Marton RG, Khaigrekht M. Repetitive transcranial magnetic stimulation combined with cognitive training is a safe and effective modality for the treatment of Alzheimer's disease: A randomized, double-blind study. *J Neural Transm* 2013;120(5):813–9.
  7. Lee J, Choi BH, Oh E, Sohn EH, Lee AY. Treatment of Alzheimer's Disease with Repetitive Transcranial Magnetic Stimulation Combined with Cognitive Training: A Prospective, Randomized, Double-Blind, Placebo-Controlled Study. *J Clin Neurol* 2015.12(1):57-64.
  8. Lefaucheur J-P, Andre-Obadia N, Antal A, Ayache SS, Baeken C, Benninger DH, et al. Evidence-based guidelines on the therapeutic use of repetitive transcranial magnetic stimulation (rTMS). *Clin Neurophysiol* 2014;125(11):2150–206.
  9. Cohen J. *Statistical Power Analysis for the Behavioral Sciences*. Revised Ed. New York: Academic Press; 1977.
  10. Wu Y, Xu W, Liu X, Xu Q, Tang L, Wu S. Adjunctive treatment with high frequency repetitive transcranial magnetic stimulation for the behavioral and psychological symptoms of patients with Alzheimer ' s disease□: a randomized , double-blind , sham-controlled study. *Shanghai Arch Psychiatry* 2016;27(5):280–8.

## Figure Legends

**Figure 1.** a) Study flowchart. b) The study design consisted on an active stimulation period for 3 weeks and a passive period without stimulation of 4 weeks. c) ADAS-Cog, d) MMSE, e) IDDD, and f) NPI line plots with error bars showing standard deviation and results from the within subjects repeated measures ANOVA. IDLPFC = Simple stimulation group on the left dorsolateral prefrontal cortex; 6-ROIs = Complex stimulation group on 6 regions of interest.; ALL = All clinical questionnaires (ADAS-cog, MMSE, NPI, IDDD, GDS-Yesavage and CGI); MMSE = Mini Mental State; ADAS-Cog = Alzheimer's Disease Assessment Scale – Cognitive; NPI = Neuropsychiatric Inventory Cummings; IDDD = Interview for Deterioration in Daily Living Activities in Dementia; GDS-Yesavage = Yesavage Geriatric Depression Scale; CGI = Clinical Global Impression; BL = Baseline; W = Week; F = f-ratio; p = p-value.
